# Supplementary material for: Bayesian Inference of Forces Causing Cytoplasmic Streaming in Caenorhabditis elegans Embryos and Mouse Oocytes
Source: PLOS journal article supplement (doi:10.1371/journal.pone.0159917), 2016-07-29
Supplement: S1 (10.1371/journal.pone.0159917.s001) [file journal.pone.0159917.s001]

## S1 Code. PIV for 3D data

The PIV\_multi\_mpi.cc program can quantify the velocity field in a 3D image sequence

|             |                                                                                                                                                                                                                                                                                                                                                                                                                                                                                                                                                                                                                                                                                                                                                                                                                                                                                                                                                                                                                                   |
|-------------|-----------------------------------------------------------------------------------------------------------------------------------------------------------------------------------------------------------------------------------------------------------------------------------------------------------------------------------------------------------------------------------------------------------------------------------------------------------------------------------------------------------------------------------------------------------------------------------------------------------------------------------------------------------------------------------------------------------------------------------------------------------------------------------------------------------------------------------------------------------------------------------------------------------------------------------------------------------------------------------------------------------------------------------|
| Environment | <ul style="list-style-type: none"><li>• A PC cluster with a Linux OS is required.</li><li>• MPI must be installed in the PC cluster.</li><li>• This program includes tiffio.h from libtiff library; therefore, libtiff library must be installed.</li></ul>                                                                                                                                                                                                                                                                                                                                                                                                                                                                                                                                                                                                                                                                                                                                                                       |
| Input       | <ul style="list-style-type: none"><li>• Images must be in .tif format.</li><li>• Image sequences must be divided according to time.</li><li>• All input files must be kept in a common folder.</li></ul>                                                                                                                                                                                                                                                                                                                                                                                                                                                                                                                                                                                                                                                                                                                                                                                                                          |
| Output      | <ul style="list-style-type: none"><li>• Output files will be named<br/>“130321_3DPIV_WORM02_EMB04_LEFT00_param3_cytoxxxxT0yy<br/>yy.txt, in which the velocity from t = xxxx to t = yyyy is output.</li><li>• The first to fourth columns of the output files are x-, y-, and z-axis components of the velocity.</li><li>• The prefix<br/>“130321_3DPIV_WORM02_EMB04_LEFT00_param3_cyto”, can be modified on line 230.</li></ul>                                                                                                                                                                                                                                                                                                                                                                                                                                                                                                                                                                                                  |
| Parameters  | <ul style="list-style-type: none"><li>• Line 16: kansoku is the distance between two mutually adjacent points in the x and y directions.</li><li>• Line 17: kensa is (xy side length of the interrogation window – 1)/2. This value is larger than 14.</li><li>• Line 18: kensa_z is (z side length of the interrogation window – 1)/2</li><li>• Line 19: kouho is the range of the search for motion in the xy direction.</li><li>• Line 20: kouho_z is the range of the search for motion in the z direction.</li><li>• Line 24: def_tate must be set as the height of the image.</li><li>• Line 25: def_yoko must be set as the width of the image.</li><li>• Line 26: def_takasa is the number of slices in the image.</li><li>• Line 27: sentou_file_num is the number allocated to the initial image. For example, to process numbered images from image_100.tif to image_200.tif, sentou_file_num = 100.</li><li>• Line 84: dirname[MAX_CHAR_NUM] must be set as the name of the folder in which data is stored.</li></ul> |
| Usage       | <ol style="list-style-type: none"><li>1. Data must be stored in one folder and PIV_multi_mpi.cc in another folder.</li><li>2. Set all parameters.</li><li>3. Compile PIV_multi_mpi.cc as an MPI source code.</li><li>4. Run the execution file from the command line.</li></ol>                                                                                                                                                                                                                                                                                                                                                                                                                                                                                                                                                                                                                                                                                                                                                   |
