# Supplementary material for: Bayesian Inference of Forces Causing Cytoplasmic Streaming in Caenorhabditis elegans Embryos and Mouse Oocytes
Source: PLoS One. 2016 Jul 29;11(7):e0159917. doi: 10.1371/journal.pone.0159917 (PMC4966953; doi:10.1371/journal.pone.0159917)
Supplement: S1 Code — A code and its manual are included in the zip file. (ZIP) [file pone.0159917.s001.zip]

Archive with 10 entries (7 files):
- S1_Code_PIV_3D/
- S1_Code_PIV_3D/.DS_Store
- __MACOSX/
- __MACOSX/S1_Code_PIV_3D/
- __MACOSX/S1_Code_PIV_3D/._.DS_Store
- S1_Code_PIV_3D/PIV_multi_mpi.cc
- __MACOSX/S1_Code_PIV_3D/._PIV_multi_mpi.cc
- S1_Code_PIV_3D/README_S1.pdf
- __MACOSX/S1_Code_PIV_3D/._README_S1.pdf
- __MACOSX/._S1_Code_PIV_3D
